# Supplementary material for: B-Cell Epitopes-Based Chimeric Protein from SARS-CoV-2 N and S Proteins Is Recognized by Specific Antibodies in Serum and Urine Samples from Patients
Source: MDPI journal article supplement (doi:10.3390/v15091877), 2023-09-05
Supplement: s1 [file s1]

## SUPPLEMENTARY FIGURES

### Surface Glycoprotein Sars-CoV-2 (YP\_009724390.1)

MFVFLVLLPLVSSQCVNLT**TRTQLPPAYTNSFTRGVYY**PDKVFRSSVLHSTQDLFLPFFSN  
 VTWFHAIHVSGTNGTKRFDNPVLPFNDGVYFASTEKSNIIRGWIFGTTLDSTQSLIVNN  
 ATNVVIKVCFFQFCNDPFLG**VYYHKNNKSWMESEFRVY**SSANNCTFEYVSQPFLMDLEGKQ  
 GNFKNLREFVFKNIDGYFKIYKHTPINLVRDLPQGFSALEPLVDLPIGINITRFQTLAL  
 HRSYLTPGDSSSGWTAGAAAYVGYLQPRTELLKYNENGITDAVDCALDPLSETKCTLKS  
 FTVEKGIYQTSNFRVQPTESIVRFPNITNLCPFGEVFNA**TRFASVYAWNRRKRISN**CVADYS  
 VLYNSASFSTFKCYGVSPKTLNLCFTNVYADSFVIRGDEV**RIAPGQTGKIADYNYKLPD**  
 DFTGCVIAWNSNNLD**SKVGGNYNYLYRLFRKSNLKPFERDIST**EIYQAGSTPCNGVEGFNC  
**YFPLQSYGFQPTNGVGY**QPYRVVLSFELLHAPATVCGPKKSTNLVKNKCVNFN**FNGLTGT**  
**GVL****TESNKKFLPFQOQGRDIADTTDAVRDP**QTLIELDITPCSFGGVSVITPGTNTSNQVAV  
 LYQDVNCTEVPVAI**HADQLTPTWRVYSTGSN**VFQTRAGCLIGAETHVNNSECDIPIGAGIC  
**ASYQTQTNSPRRARS**SVASQSI IAYTMSLGAENSVAYSNNNSIAIPTNFTISVTTEILPVSM  
 KTSVDCMTYICGDSTECNLLQYGSFCTQLNRALTGIAVEQDKNTQEVFAQVKQIYKTPP  
 IKDFGGFNFSQ**ILPDPSKPSKRSFIEDLLFNKV**TLADAGFIKQYGDCLGDIAARDLCAQK  
 FNGLTVLPPLLTDEMIAYTSALLAGTITSGWTFGAGAAQIPFAMQMAYRFNGIGVTQNV  
 LYENQKLIANQFNSAIGKIQDSLSTASALGKLQDVVNQNAQALNTLVKQLSSNFGAISV  
 LNDILSRDKVEAEVQIDRLITGRLQSLQTYVTQQLIRAAEIRASANLAATKMSECVLGQS  
 KRVDFCGKGYLHMSFPQSAPHGVVFLHVTYVPAQEKNTTAPAICHGDKAHFPREGVFVSN  
 GTHWFVTQRNFYEPQIITDNTFVSGNCDVVIIGIVNNTVYDPLQPELDS**FKEELDKYFKNH**  
**TSPVDLGL**ISGINASVUNIQKEIDRLNEVAKNLNESLIDLQELGKYEQYIKWPWYIWLGF  
 IAGLIAIVMVTIMLCCMTSCCCLKGCCSCGSCCKFDEDDSEPVLLKGVKLHYT

- S1 subunit: 14-685 aa
  - S1 RBD: 319-541 aa
  - S2 subunit: 686-1273 aa
- Selected epitopes**

### Nucleocapsid Phosphoprotein (YP\_009724397.2)

MSDNGPQNQRNAPRITFGGPSDS**TGSNONGERSGARSKORRPOGL**PNNNTASWFTALTQHGK  
 EDLKFPRGQGVPI**NTNSPDDQIGYYRRATRR**IRGGDGKMKDLSRWYFYLLGTGPEAGLP  
 YGANKDGIWVATEGALNTPKDHIGTRNPANNAIIVLQLPQGTTLPGFYAEGSRGGSQAS  
**SRSSSRSRNSRNSTPGS**SRGTSPARMAGNGGDAALALLLDRLNQLESKMSGKGQQQQ**GO**  
**TVTKKSAAEASKKPRQKRT**ATKAYNVTQAFGRRGPEQTQGNFGDQELIRQGTDYKHWPQIA  
 QFAPSASAFFGMSRIGMEVTPSGTWLTYTGAIKLDDKDPNFKDQVILLNKHIDAYKTFPPT  
 EPKKDKKKKADETQALPQRQKKQQTVTLLPAADLDDFSKQLQSMSSADSTQA

- N protein: 1-419aa
- Selected epitopes**

**Supplementary Figure S1. Identification of linear B-cell epitopes by bioinformatics analysis.**  
 The amino acid sequences of surface glycoprotein (YP\_009724390.1) and nucleocapsid phosphoprotein (YP\_009724397.2) proteins were evaluated by bioinformatics tools. Four linear B-cell epitopes were selected from N protein and eleven from S protein.

## Surface glycoprotein

|                   |                                                                        |
|-------------------|------------------------------------------------------------------------|
| <b>Sars-CoV-2</b> | --MFVFLVLLPLVS-----SQCVNL <b>TTRTQLPPAYTNSFTRGVVYP</b>                 |
| Sars-CoV-1        | --MFIFLLFLTLTSGS-----DLDRCTTFDDVQAPNYTQHTSSMRGVVYP                     |
| HCoV-229E         | --MFVLLVA-----                                                         |
| HCoV-NL63         | MKLFLILLVLPLASCFFTCNSNANLSMLQLGVPDSSSTIVTGLLPTHWFCANQSTSVYSA           |
| HCoV-OC43         | --MFLILLISLPTAFAVIGDLNCPLDPKLGSGFNNRDTGSPSISTDTVD-VTNGLGTYIV           |
| HCoV-HKU1         | ---MLLIIIFILPTTLAVIGDFNCTNF-----AINDKNTTVPRISEYVVD-VSYGLGTYII          |
| MERS-CoV          | MIHSVFLLMFLLTPTESYVDVGPDSVKSACIEVDIQQTFFDKTWPRPID-VSKADGIYYP           |
|                   | : : : :                                                                |
| <b>Sars-CoV-2</b> | DKVFRSSVLHSTQDLFLPF---FSNVTWFHAIHVS GTNGTKRF---DNPVLPFNDGVYF           |
| Sars-CoV-1        | DEIFRSDTLYLTQDLFLPF---YSNVTGFHTINHTFGNP-----VIPFKDGIYF                 |
| HCoV-229E         | -----YALLHIAGCQTNGTN-----                                              |
| HCoV-NL63         | NGFFYIDVGNHRSFALHTGYIDANQYIIYVTNEIGLNASVTL-----KICKFSRNTTF             |
| HCoV-OC43         | LDRVYLNNTTLFLNGYYPTSGSTYRNMALKGTDLLSTLWFKPPF-----LSDFINGIFA            |
| HCoV-HKU1         | LDRVYLNNTSILFTGYFPKSGANFRDLSLKGTTYLSTLWYQKPF-----LSDFNNGIFS            |
| MERS-CoV          | QGRYSNITITYQGLF-PYQGDHGDYVYSAGHATGTTTPQKLFVANYSQDVKQFANGFVV            |
| <b>Sars-CoV-2</b> | ASTEKSN-----IIRGWIFGTTLDSKT-----QSL---LIVNNA                           |
| Sars-CoV-1        | AATEKSN-----VVRGWVFGSTMNKS-----QSV---IIINNS                            |
| HCoV-229E         | -----                                                                  |
| HCoV-NL63         | DFLSNASSSFDCIVN-----LLFTEQLGAPLGITISGETVRLHLYNVTRTFYVPA                |
| HCoV-OC43         | KVKNTKVFKGDMYS-----EFPATIGSTFVNTS-----YSV---VVQPRT                     |
| HCoV-HKU1         | RVKNTKLYVNKTLYS-----EFSTIVIGSVFINNS-----YTI---VVQPHN                   |
| MERS-CoV          | RIGAAANSTGTVIIISPSTSATIRKIYP AFMLGSSVGNFSDGKMGRFFNHTL---VLLPDG         |
| <b>Sars-CoV-2</b> | TNV-----VIKV-----CEFQFCND-----PFLG <b>VY</b>                           |
| Sars-CoV-1        | TNV-----VIRA-----CNFELCDN-----PFFAVS                                   |
| HCoV-229E         | -----TSHSVCNGCVGHSENVFAVESGGY                                          |
| HCoV-NL63         | YKLTKL SVKCYFNYSVFSVFNATVTNVNTHNGRVVNYTVCDDCNGYTDNIFSVQQDGR            |
| HCoV-OC43         | INSTQDGVNKLQGLLEV-----SVCQYNMCEH-----PHTICH                            |
| HCoV-HKU1         | -----GVLEI-----TACQYTMCEY-----PHTICK                                   |
| MERS-CoV          | CGT-----LLRAFYCILEPRSGNHCPAGNSHTSFATYHT-----PATDCS                     |
|                   | . .                                                                    |
| <b>Sars-CoV-2</b> | <b>YHKNN---KSWMESEFRVY</b> SSANNCTFEY---VSQPFLMDLEGKQGNFKNLR EFVFKNID  |
| Sars-CoV-1        | KPMGT-----QTHTMIFDNAFNCTFEY---ISDAFSLDVSEKSGNFKHLREFVFKNKD             |
| HCoV-229E         | IPSNFAFNWFLLTNTSSVDGVVRSFQ-----PLLNLCLWSVSGSQFTTG FVYFNGT              |
| HCoV-NL63         | IPNGFFFNWFLLTNGSTLVDGVSRLYQ-----PLRLTCLWPVPLKSGTG FVYFNAT              |
| HCoV-OC43         | PNLGNHFKEW-HLDTGVVSCLYKRNFTY-----DVNATYLY-----FHFYQEG                  |
| HCoV-HKU1         | SK-GSFRNESW-HFDKSEPLCLFKKNFTY-----NVSTDWLY-----FHFYQER                 |
| MERS-CoV          | D--GNYNRNAS-LNSFKEYFNLRNCTFMYTYNITEDEILEWFGITQTAQGVHLFSSR---           |
|                   | . : *                                                                  |
| <b>Sars-CoV-2</b> | GY---FKIYSKHTPINLVRDLPQGFSALEPLVDLPIGINI--TRFQTLLALHR-SYLT PG          |
| Sars-CoV-1        | GF---LYVYKGYQPIDVVRDLP SGFNTLKPIFKLPLGINI--TNFRAILTAFS-----P           |
| HCoV-229E         | GRGA-CKGFYSNASSDVIR-----YNIN-FEENLRRTILFKTSYGAVVFYCTNNTLVSG            |
| HCoV-NL63         | GSDVNCNGYQHNSVVDVVR-YNLNFSAN-SLDNLKSGVIVFKTLQYDVLFYCSNSSSGVL           |
| HCoV-OC43         | GT---FYAYFTDT-----GFVTK-FLFNVLGMAL--SHYYVMPLTCI-----S                  |
| HCoV-HKU1         | GT---FYAYADS-----GMPTT-FLFSLYLGTLL--SHYYVLPLTCNAISSNTD                 |
| MERS-CoV          | -Y---VDLYGG---NMFQ-----FATL-PVYD-----T---IKYYSIIPHSI-RSIQSD            |
|                   | : . :                                                                  |
| <b>Sars-CoV-2</b> | DSSSGWTAGAAAYYVGYLQPRTFLLKYNENGTITDAVDCALDPLSETKCTLKSFTVEK-G           |
| Sars-CoV-1        | AQDI-WGTSAAYYFVGYLKPTTFMLKYDENGITITDAVDCSQNPLAELKCSVKSFEIDK-G          |
| HCoV-229E         | DAHIPSGTVLGNFYCF-----VNTTIGN--ETTSFVGVGALPKTVREFVISRTG                 |
| HCoV-NL63         | DTTIPFGPSSQPYCF-----INSTINT--THVSTFVGILPPTVREIVVARTG                   |
| HCoV-OC43         | RRDIGF---TLEYWVTPLTRQYLLAFNQDGIIFNAVDCMSDFMSEIKCKTQSIAPPT-G            |
| HCoV-HKU1         | NETLQY-----WVTPLSKRQYLLKFDNRGVITNAVDCSSSFFSEIQCKTKSLLPNT-G             |
| MERS-CoV          | RKA--W---AAFYVYKLQPLTFLLDFSVDGYIRRAIDCGFNDLSQLHCSYESFDVES-G            |
|                   | : * . . . :                                                            |
| <b>Sars-CoV-2</b> | IYQTSNFRVQPTESIVRFPNITNLCPFGEVFNA <b>TRFASVYAWNRRKRISN</b> CVADYS----- |

Sars-CoV-1 IYQTSNFRVVPSPGDVVRFPNITNLCPFGEVFNAT**KF**PSVYAW**ERK**KISNCVADYS-----  
HCoV-229E HFYINGRYFSLGNV-----EAVNFNVTNAATTVCT---VALASYADVLNVNSQTAIA  
HCoV-NL63 QFYINGFKYFDLGFI-----EAVNFN--VTTASATDFWTVAFATFVDVLNVNSATNIQ  
HCoV-OC43 VYELNGYTVQPIADVYRRKPDLPNCNIEAWLNDKSVSPPLNWERKTFSNCFNMS-----  
HCoV-HKU1 VYDLSGFTVKPVATVHRRIPDLPCDIDKWLNNFNVPSPLNWGRKIFSNCFNLS-----  
MERS-CoV VYSVSSFEAKPSGSVVEQAEGVE-CDFSPLLSGTP-PQVYNFKRLVFTNCNYNLT-----  
: .: : :

**Sars-CoV-2** -VLYNSASFSTFKCYGVSPTKLNLCFTNVYADSFVIRGDEV**R-QIAPGQTGKIADYNYK**  
Sars-CoV-1 -VLYNSTFFSTFKCYGVSATKLNLCFSNVYADSFVVGDDVR-QIAPGQ**TGVI**ADYNYK  
HCoV-229E NIIYCNSVINRLRCDQLSFDVDPG-FYSTSPIQPVELPVSVISLPVYHKHTFIVLYVNF  
HCoV-NL63 NLLYCDSPFEKLQCEHLQFGLQDG-FYSANFLDDNVPETYVALPIYYQHT---DINFT  
HCoV-OC43 -SLMSFIQADSFTCNNIDAAKIYGMCFSSITIDKFAIPNRRKV-DLQLGNLGYLQSSNYR  
HCoV-HKU1 -TLLRLVHTDSFSCNFDISKIYGSCFKSIVLDKFAIPNSRRS-DLQLGSSGFLQSSNYK  
MERS-CoV -KLLSLFSVNDFTCQISPAAIASNCYSSLLIDYFSYPLSMKS-DLSVSSAGPISQFNYK  
: . : \* . . . : : \*

**Sars-CoV-2** LPDDFTGCVIAWNSNNLDSKVG**G---NY-NYLYRLFRKS**-----  
Sars-CoV-1 LPDDFMGCVLAWNTRNIDATSTG---NY-NYKYRYLRHG-----  
HCoV-229E HQRGPGKC-YNCRPAVINITLANFNETKG-PLCVDTSHT-----TQF  
HCoV-NL63 ATASFGGSCYVCKPHQVNI SLNG---NT-SVCVRTSHFS-----IRY  
HCoV-OC43 IDTTATSCQLYYNLPAANVSVSFRNPSTW-NKRFGFIEDSVFVPQPTGVFTNHSVVYAQH  
HCoV-HKU1 IDTTSSSCQLYSLPAINVTINNYPSSW-NRRYGFNNFN-----LSSHSVVYSRY  
MERS-CoV QSFNPTCLILATVPHNLTITTKPLKYSYINKCSRLLSDD-----  
. . .

**Sars-CoV-2** -----**NLKPFFERDIST**EIYQAGSTPCNGV-----EGF  
Sars-CoV-1 -----KLRPFFERDISNVFSPDGKPCPTP-----AL  
HCoV-229E VDNVK-----LARWSASINTGNCPFSFG-----KV  
HCoV-NL63 IYNRVKSGSPG-----DSSWHIYKSGTCPFSSFS-----KL  
HCoV-OC43 CFKAPKNFCPC-----SSCPGKNNGIGTCPAGTNSLTCDNL-----CTLDPI  
HCoV-HKU1 CFSVNNTFCPCAKPSFASCKSHKPPSASCPIGTNYRSCESTTVLDHTDWCRCSCLPDPI  
MERS-CoV -----RTEVPQLVNAVQYSPCVSI-----VPS

**Sars-CoV-2** NCY**FPLQSYGFQPTN--GVGY**QPYRVVV-----LSFE----L  
Sars-CoV-1 NCYWPLNDYGFYTTT--GIGYQPYRVVV-----LSFE----L  
HCoV-229E INFVKFGSVCFLKYPGGCAMPIMANLV-----NHKSHNIGSLYVSWSDGDVI  
HCoV-NL63 NNFQKFKTICFSTVEVPGSCNFPLEATWH-----YTSYTIYGALYVTWSEGNSI  
HCoV-OC43 TFKAPDTYKCPQTKSLVGIGEHCSGLAVKSDYCG-----NNSCTQPQAFLGWSADSC  
HCoV-HKU1 TAYDPRS--CSQKSLVGVGEHCAGFGVDEEKCGVLDGSYNVSCLCSTDAFLGWSYDTCV  
MERS-CoV TVWEDGDYYRKQLSPLEGGGWLVAS-----GSTVAMTEQLQMGFGITVQY  
\* : :

**Sars-CoV-2** LHAPATVC-----GPKKSTNLVKNK-----CVNFNFNGLTGTGVL**TESNKKFL**  
Sars-CoV-1 LNAPATVC-----GPKLSTDLIKNQ-----CVNFNFNGLTGTGVL**PSSKRFL**  
HCoV-229E TGVPKPVE-----GVSSFMNVTLNK-----CTKYNIYDVSGVGIRISNDFTL  
HCoV-NL63 TGVYPYVS-----GIREFSNLVLNN-----CTKYNIYDVGTGIIRSSNQSLA  
HCoV-OC43 QGDKCNIFANFILHDVNGLTCSTDLQKANTEIELGVCVNYDLYGISGQGFVEVNATYY  
HCoV-HKU1 SNNRCNIFSNFILNGINS GTTCSNDLLQSNTEVFTDVCADYDLYGITGQGFKEVS AVYY  
MERS-CoV GTDNTSVCP-----KLEFANDTKIAS---QLGNCVEYSLYGVSGRGVFQNTAVGV  
: : . \*...: . \* \*: .

**Sars-CoV-2** **P-FQQFGRDI-ADTTDAVRDPQ**TLEILDITPCSFGGVSVITPGTNTSNQVAVLYQDVNCT  
Sars-CoV-1 P-FQQFGRD**V-SDF**TD**S**VRDPKTSEILDISPCSFGGVSVITPGTNASSEVAVLYQDVNCT  
HCoV-229E N-GITYTSTS-GNLLG-FKDVTNGTIYSITPCNPPDQLVVYQQAVVGAMLSNFTSYG--  
HCoV-NL63 G-GITYVSNS-GNLLG-FKNVSTGNIFIVTPCNQPDQVAVYQQSIIGAMTAVNESRYG--  
HCoV-OC43 NSWQNLLYDSNGNLYG-FRDIYITNRTFMIHSCYSGRVSAAYHANSPEP--ALLFRNLKCN  
HCoV-HKU1 NSWQNLLYDSNGNIIG-FKDFTVNTKTYNIFPCYAGRVSAAFHQNASL--ALLYRNLKCS  
MERS-CoV R-QQRFVYDAYQNLVGYYS--DGNYYCLRACVSVPSVVIYDKETKTH--ATLFGSVACE  
: . : : .\* . :

**Sars-CoV-2** EVPVAI--**HADQLTPTRVYSTGSN**VFQTRAGCLIGAEHVNSY---ECDIPIGAGICAS  
Sars-CoV-1 DVSTAI--HADQLTP**AWRI**YSTGNNVFQTAGCLIGAEHVDTSY---ECDIPIGAGICAS  
HCoV-229E -----FSN-VVEMPKFFYASNGTY---NCTDAV-LTYSSF-----GVCAD  
HCoV-NL63 -----LQN-LLQLPNFYVSNNGN---NCTTAV-MTYSNF-----GICAD  
HCoV-OC43 YV-----FNNSLTRQLQPINYSFDSY---LGCVVNA-YNSTAISVQTCDLTVGSGYCV  
HCoV-HKU1 YV-----LNN-ISLATQPY---FDSY---LGCVFNA-DNLTDSVSSCALRMGSGFCVD

|                   |                                                                      |
|-------------------|----------------------------------------------------------------------|
| MERS-CoV          | HISSTMSQYSRSTRSMLKRRDSTYGPLQTPVGCVLG--LVNSSLFVEDCKLPLGQSLCAL         |
|                   | . . . * . . *                                                        |
| <b>Sars-CoV-2</b> | <b>YQTQ--TNSPRRARS</b> VASQ---SIIAYTMSLGAENSVAY--SNNSIAIPTNFTISVTTEI |
| Sars-CoV-1        | YHTVS--LLRSTSQKSI-----VAYTMSLGADSSIAI--SNNTIAIPTNFSISITTEV           |
| HCoV-229E         | G-----SIIAVQPRNVSYD-----SVSAIVTA-----NLSIPSNWTTTSVQVEY               |
| HCoV-NL63         | G-----SLIPVRPRNSSDN-----GISAITA-----NLSIPSNWTTTSVQVEY                |
| HCoV-OC43         | Y-----SKNRRSRRAITTGYRFTNFEPFTVNSVNDLSLEPVGGLYEIQIPSEFTIGNMEEF        |
| HCoV-HKU1         | YNPSSSSSSRKRRSISASYRFVTFEFPNVSVFVNDIESVGGLYEIKIPTNFTIVGQEEF          |
| MERS-CoV          | PDTFS--TLTPRSVRSVPGEMRLASIAFNHPIQVDQLNSS---YFKLSIPTNFSFGVTQEY        |
|                   | . . : **::: *                                                        |
| <b>Sars-CoV-2</b> | LPVSMTKTSVDCTMYICGDSTECSNLLQYGSFCTQLNRALTGIAVEQDKNTQEVFAQVK          |
| Sars-CoV-1        | MPVSMAKTSVDCNMYICGDSTECANLLQYGSFCTQLNRALSGIAAEQDRNTREVFAQVK          |
| HCoV-229E         | LQITSTPIVDCSTYVCNGNVRCVELLKQYTSACKTIEDALRNSAMLESADVSEMLTFDK          |
| HCoV-NL63         | LQITSTPIVDCATYVCNGNPRCKNLLKQYTSACKTIEDALRLSAHLETNDVSSMLTFDS          |
| HCoV-OC43         | IQTSSPKVTIDCAAFVCGDYAACKLQLVEYGSFCDNINAILTEVNELLDTTQLQVANSML         |
| HCoV-HKU1         | IQTNSPKVTIDCSLFVCSNYAACHDLLSEYGTFCDNINSILDEVNGLLDTTQLHVADTLM         |
| MERS-CoV          | IQTTIQKVTVDCQYVCNGFQKCEQLLREYQGFCSKINQALHGANLRQDDSVRNLFASVK          |
|                   | : . : ** :*: . * * :* * : : *                                        |
| <b>Sars-CoV-2</b> | Q-IYKTPPIKDFGGF-----NFS-QILP----DPSKPSKRSFIEDLLFNKVT                 |
| Sars-CoV-1        | Q-MYKTPTLKYFGGF-----NFS-QILP----DPLKPTKRSFIEDLLFNKVT                 |
| HCoV-229E         | K-AFTLANVSSFGDY-----NLS-SVIPSLPRSGSRVAGRSAIEDILFSKLVTSGLGTVD         |
| HCoV-NL63         | N-AFSLANVTSFGDY-----NLS-SVLPQRNIRSSRIAGRSAEDLLFSKVVTSGLGTVD          |
| HCoV-OC43         | NGVTLSCLKLDGVNFNVDDINF-S-PVLGCLGSECSKASSRSAIEDLLFDKVKLSDVGFVE        |
| HCoV-HKU1         | QGVTLSSNLNTNLHFDVDNINF-S-SRSGCLGPHCGS--SSRSFFEDLLFDKVKLSDVGFVE       |
| MERS-CoV          | S-SQSSPIIPGFGG-----DFNLTLEPVSISTGSRARSIAIEDLLFDKVTIADPGYMQ           |
|                   | . . : : : ** :*: ** :* : . * :.                                      |
| <b>Sars-CoV-2</b> | Q-YGDCL--GDIAARDLICAQKFNGLTVLPPLLTDEMIAQYTSALLAGTITSGWTFGAGA         |
| Sars-CoV-1        | Q-YGECL--GDINARDLICAQKFNGLTVLPPLLTDMIAAYTAALVSGTATAGWTFGAGA          |
| HCoV-229E         | ADYKKT--KGLSIADLACAQYYNGIMVLPGVADAERMAMYTGSLIGGIALGGLTSAAS-          |
| HCoV-NL63         | VDYKST--KGLSIADLACAQYYNGIMVLPGVADAERMAMYTGSLIGGMVLGGLTSAAS-          |
| HCoV-OC43         | A-YNNCT--GGAERDLICVQSYKGIKVLPLLSENQISGYTLAATSASLFPFWTAAAG-           |
| HCoV-HKU1         | A-YNNCT--GGSEIRDLLCVQSFNGIKVLPILSESQISGYTTAATVAAMFPWWSAAAG-          |
| MERS-CoV          | G-YDDCMQQGPASARDLICAQYVAGYKVLPLMDVNMEAAYTSSLLGSIAGVGWTAGLSS          |
|                   | * . * * * * : . : * : . .                                            |
| <b>Sars-CoV-2</b> | ALQIPFAMQMAYRFNGIGVTVQNVLYENQKLIANQFNQSAIGKIQDSLSTAS-----            |
| Sars-CoV-1        | ALQIPFAMQMAYRFNGIGVTVQNVLYENQKLIANQFNKAISIQESLTTTST-----             |
| HCoV-229E         | ---IPFSLAIQSRNLNYVALQTDVLQENQRILAASFNKAMTNIVDAFTGVNDAITQTSQAL        |
| HCoV-NL63         | ---IPFSLALQARLNYVALQTDVLQENQKILAASFNKAINNIVASFSSVNDAITQTAEAI         |
| HCoV-OC43         | ---VPFYLVQYRINGLGVTMVLSQNKLIANAFNNALHAIQQGFATNS-----                 |
| HCoV-HKU1         | ---IPFSLNVQYRINGLGVTMVVLNKNQKLIATAFNNALLSIQNGFSATNS-----             |
| MERS-CoV          | FAAIPFAQSIIFYRLNGVGITQQVLSQNKLIANKFNQALGAMQTGFTTTNE-----             |
|                   | : ** : * : * : : : * : * : : . : *                                   |
| <b>Sars-CoV-2</b> | -----ALGKLQDVVNQNAQALNTLVKQLSSNFGAISSVLNDILSRDKVEAEVQIDRLIT          |
| Sars-CoV-1        | -----ALGKLQDVVNQNAQALNTLVKQLSSNFGAISSVLNDILSRDKVEAEVQIDRLIT          |
| HCoV-229E         | QTVATALNKIQDVVNQQGNSLNHLTSQLRQNFQAISSSIQAIYDRLDIIQADQQVDRLIT         |
| HCoV-NL63         | HTVTIALNKIQDVVNQQGSALNHLTSQLRHNQFQAISSSIQAIYDRLDSIQADQQVDRLIT        |
| HCoV-OC43         | -----ALVKIQAVVNANSEALNLLQQLSNRFGAISASLQEILSRDLAEAEQIDRLIN            |
| HCoV-HKU1         | -----ALAKIQSVVNSNAQALNSLLQQLFNKFGAISSSLQEILSRDLAEAEQVQIDRLIN         |
| MERS-CoV          | -----AFRKVQDAVNNAQALSKLASELSNTFFGAISASIGDIIQRLDVLEQDAQIDRLIN         |
|                   | * : * : * . ** : : : * . * : * * * : * . * * : : : * : * * * .       |
| <b>Sars-CoV-2</b> | GRLQSLQTYVTQQLIRAAEIRASANLAATKMSECVLGQSKRVDFCGKGYHLSMFPQSAPH         |
| Sars-CoV-1        | GRLQSLQTYVTQQLIRAAEIRASANLAATKMSECVLGQSKRVDFCGKGYHLSMFPQAAPH         |
| HCoV-229E         | GRLLALNVFVSHTLTKYTEVRASRQLAQKQVNECVKSQSKRYGFCGNGTHIFSLVNAAPE         |
| HCoV-NL63         | GRLLALNAFVSQVLNKYTEVRGSRRLAQKQKINECVKSQSNRYGFCGNGTHIFSIVNSAPD        |
| HCoV-OC43         | GRLTALNAYVSQQLSDSTLVKFSAAQAMEKVNECVKSQSSRINFCGNGNHISLVQNAPY          |
| HCoV-HKU1         | GRLTALNAYVSQQLSDISLVKFGAALAMEKVNECVKSQSPRINFCGNGNHISLVQNAPY          |
| MERS-CoV          | GRLTTLNAFVAQQLVRSESAALSQAQLAKDKVNECVKAQSKRSGFCGQGTHIVSFVVNAPN        |
|                   | *** :*: :*: : * . * * :*: * * . * * : * * : * * : *                  |
| <b>Sars-CoV-2</b> | GVVFLHVTYVPAQEKNFTTAPAICHDG---KAHFPREGVFVSNGTH-----WFVTQRNFI         |
| Sars-CoV-1        | GVVFLHVTYVPSQERNFTTAPAICHEG---KAYFPREGVFVFNGTS-----WFITQRNFI         |



|                   |                                                                        |
|-------------------|------------------------------------------------------------------------|
| HCoV-OC43         | ADGNQRQLLPWYFYLLGTGPHAKDQYGTIDGVFWVASNQADVNTPADIVDRDPSSDEA             |
| HCoV-HKU1         | ADGQKQLLPWYFYLLGTGPHYASSYGDAHEGIFWVASHQADTSIPSDVSARDPTIQEA             |
| HCoV-229E         | RKGRVDLSPKLHFYLLGTGPHKDAKFRERVEGVVWVAVDGAKTEP-TGYGVRKKNSEPE            |
| HCoV-NL63         | RRGQRVDLPKVFHYLLGTGPHKDLKFRQRSDGVVWVAKEGAKTVN-TSLGNRKNQKPL             |
| MERS-CoV          | GNG-IKQLAPRWYFYTTGTGPEALPFAVKDGIWVHEYGATDAP-STFGTRNPNNDASA             |
|                   | * : * * . : *** * * * : : * : * *                                      |
| <b>SARS-CoV-2</b> | IV---LQLPQGTTLPGFYAEGSRGGSQASS <b>SRSSSR--SRNSSRNSTPGSS</b> SRGTSPARMA |
| SARS-CoV-1        | TV---LQLPQGTTLPGFYAEGSRGGSQASSR <b>SSSR--SRGN</b> SRNSTPGSSRGNSPARMA   |
| HCoV-OC43         | IP---TRFPPTVLPQGYIEGSG-----RSAPN--SRSTRTSSRAFSAGS--RSRA                |
| HCoV-HKU1         | IP---TRFSPGTILPQGYIEGSG-----RSASN--SRPGSRSSRGPNNRS--LSRS               |
| HCoV-229E         | IPHFNQKLPGVTVAE---EPDSRAPSRSSQSRSSQSR--SRGESKSSRNPPSSDR--NHNS          |
| HCoV-NL63         | EPKFSIALPELSVVE--FEDRSNNSSRASSRSSTRNNSRDSSRSTSRQQSRTRSDSNQS            |
| MERS-CoV          | IV---TQFAPGTKLPKNFHIEGTGGNSQSSSRASSV--SRNSSRSSSQSGSRSGN--STRG          |
|                   | : . : : : * : . * * * . : :                                            |
| <b>SARS-CoV-2</b> | GNGGDAALALLL-----LDRLNQLESKMSGKGQQQQ <b>G-----QTVTKK</b>               |
| SARS-CoV-1        | SGGGETALALLL-----LDRLNQLESKMSGKGQQQQG-----QTVTKK                       |
| HCoV-OC43         | SSGNRAPTSVGPDMADQ---IASLVLA KLKGDATKPPQVVT-----KHTAKE                  |
| HCoV-HKU1         | NSNFRHSDSIVKPDMADE---IASLVLA KLKGD-SKPQVVT-----KQNAKE                  |
| HCoV-229E         | QDDIMKAVAAALKSLGFDKPKQEKDKSAKTGTPKPSRNQSPASSQSAKILARSQSSETK            |
| HCoV-NL63         | SSDLVAAVTLALKNLGFD---NQSKSPSSSGTSTPKKPNKP-----LSQPRS                   |
| MERS-CoV          | TSPGSPSIGAVGGDLLY---LDLLNRLQALESGKVKQSQP-----KVITKK                    |
|                   | . . . . .                                                              |
| <b>SARS-CoV-2</b> | <b>SAAEASKKPRQKRT</b> ATKA--YNVTQAFGRRGPEQTQGNFGDQELIRQGTDYKHWPQIAQF   |
| SARS-CoV-1        | SAAEASKKPRQKRTATKQ--YNVTQAFGRRGPEQTQGNFGDQDLIRQGTDYKHWPQIAQF           |
| HCoV-OC43         | VRQKILNKPRQKRSPNKQ--CTVQQCFGKRGPNQ---NFGGGEMLKLGTSDPQFPILAEL           |
| HCoV-HKU1         | IRHKILMKPRQKRTPNKF--CNVQQCFGKRGPLQ---NFGNSEMLKLGTNDPQFPILAEL           |
| HCoV-229E         | EQKHMEQKPRWKRQPNDDVTSNVTQCFGPRDLDH---NFGSAGVVANGVKAKGYPQFAEL           |
| HCoV-NL63         | DKPSQLKKPRWKRVPTR--ENVIQCFGPRDFNH---NMGDSDLVQNGVDAGFPQLAEL             |
| MERS-CoV          | DAAAANKMRHKRTSTKS--FNMVQAFGLRGPGDLQGNFGDLQLNKLGTEDPRWPQIAEL            |
|                   | * * . * * . . : : * * * * * * : * : * . : * : * :                      |
| <b>SARS-CoV-2</b> | APSASAFFGMSRIGMEVTPS-----GTWLTYTGAIKLDDKDPNFKDQVILLNKH                 |
| SARS-CoV-1        | APSASAFFGMSRIGMEVTPS-----GTWLTYHGAIKLDDKDPQFKDNVILLNKH                 |
| HCoV-OC43         | APTAGAFFFGSRLELAKVQNLSGNPDEPQKDVEYELRYNGAIRFDSTLSGFETIMKVLNEN          |
| HCoV-HKU1         | APTGAFFFGSKLELFRKDS---DADSPSKDTFELRYSGSIRFDSTLPGFETIMKVLKEN            |
| HCoV-229E         | VPSTAAMLFDSHIVSKESGN-----TVVLTFTRVTVPKDHPHLGKFL---EE                   |
| HCoV-NL63         | IPNQAALFFDSEVSTDEVGD-----NVQITYTYKMLVAKDNKNLPKFI----EQ                 |
| MERS-CoV          | APTASAFMGMSQFKLTHQNN-----DDHGNPVYFLRYSGAIKLDPKNPNYNKWLLELQEN           |
|                   | * . . * : * . . : : : : : :                                            |
| <b>SARS-CoV-2</b> | IDAY-----KTFPPTEPK--KDKKKKADETAQALPQRQKKQQTVTLLPAADLDDF                |
| SARS-CoV-1        | IDAY-----KTFPPTEPK--KDKKKKTDEAQLPQRQKKQPTVTLLPAADMDDF                  |
| HCoV-OC43         | LNAY---QQQDGMNMSPKPRQRGLKNGQGENDNISVASPKSRVQQNKSRELTAEDISL             |
| HCoV-HKU1         | LDAYVNSNQNTVSGSLSPKPRQRGRGVKQSPESFDSLNLSDADTQHISN----DFTPEDHSL         |
| HCoV-229E         | LNAF-----TREMQQQLLNPSALEFNPSQTSPTATV--EPVRDEVSI                        |
| HCoV-NL63         | ISAF-----TKPSSIKEMQSSSHVAQNTVLNASIPES-----KPLADDDSA                    |
| MERS-CoV          | IDAY-----KTFPKKEKKQKAPKEESTDQMSEPPKEQRVQGSIT-QRTRTRPSV                 |
|                   | : . * : . . . : : : :                                                  |
| <b>SARS-CoV-2</b> | SKQLQQSMS--SADSTQA                                                     |
| SARS-CoV-1        | SRQLQNSMSGASADSTQA                                                     |
| HCoV-OC43         | LKKMDEPY---TEDTSEI                                                     |
| HCoV-HKU1         | LATLDDPY---VEDSVA-                                                     |
| HCoV-229E         | ETDI-----IDEVN--                                                       |
| HCoV-NL63         | IIEI-----VNEVLH-                                                       |
| MERS-CoV          | QPGP-----MIDVNTD                                                       |
|                   | :                                                                      |

**Supplementary Figure S2: Amino acid sequence alignment of N4S11-CoV2 and some other CoV virus of interest.** Alignment was conducted by the CLUSTAL multiple sequence alignment / MUSCLE (3.8). Legend: Asterix (\*) positions with a single, fully conserved residue. Colon (:) positions with conservation between amino acid groups of similar properties. Period (.) positions with conservation between amino acid groups of weakly similar properties. S protein accession numbers: YP\_009724390.1 Surface glycoprotein [SARS-CoV-2], P59594.1 Spike glycoprotein

[SARS-CoV], K9N5Q8.1 Spike glycoprotein [MERS-CoV], QNT54842.1 surface glycoprotein [Human coronavirus 229E], AIX10763.1 Spike glycoprotein [Human coronavirus OC43], YP\_003767.1 spike protein [Human coronavirus NL63], AXT92555.1 spike glycoprotein [Human coronavirus HKU1]. N protein accession number: YP\_009724397.2C Nucleocapsid phosphoprotein [SARS-CoV-2], P59595.1 Nucleocapsid protein [SARS-CoV], K9N4V7.1 Nucleocapsid protein [MERS-CoV], WDE18042.1 surface glycoprotein [Human coronavirus 229E], QDH43730.1 N [Human coronavirus OC43], QED88044.1 nucleocapsid protein [Human coronavirus NL63], AYN64565.1 nucleocapsid phosphoprotein [Human coronavirus HKU1].



| Sars-CoV- 2 Variants | Pep 1 - S1 subunit  | Pep 2 - S1 subunit | Pep 4 - RBD S1 subunit | Pep 5 - RBD S1 subunit | Pep 7 - RBD S1 subunit        |
|----------------------|---------------------|--------------------|------------------------|------------------------|-------------------------------|
| N4S11-SC2            | TRTQLPPAYTNSFTRGVYY | VYYHKNNKSWMESEFRVY | TRFASVYAWNRRKRISN      | QIAPGQTGKIADYNYKLP     | SKVGGNYNYLYRLFRKSNLKPFFERDIST |
| Alpha                | TRTQLPPAYTNSFTRGVYY | VYYHKNNKSWMESEFRVY | TRFASVYAWNRRKRISN      | QIAPGQTGKIADYNYKLP     | SKVGGNYNYLYRLFRKSNLKPFFERDIST |
| Beta                 | TRTQLPPAYTNSFTRGVYY | VYYHKNNKSWMESEFRVY | TRFASVYAWNRRKRISN      | QIAPGQTGNIADYNYKLP     | SKVGGNYNYLYRLFRKSNLKPFFERDIST |
| Gamma                | NRTQLPSAYTNSFTRGVYY | VYYHKNNKSWMESEFRVY | TRFASVYAWNRRKRISN      | QIAPGQTGKIADYNYKLP     | SKVGGNYNYLYRLFRKSNLKPFFERDIST |
| Delta                | TRTQLPPAYTNSFTRGVYY | VYYHKNNKSWMESEFRVY | TRFASVYAWNRRKRISN      | QIAPGQTGKIADYNYKLP     | SKVGGNYNYLYRLFRKSNLKPFFERDIST |
| Omicron              | TRTQLPPAYTNSFTRGVYY | VYYHKNNKSWMESEFRVY | TRFASVYAWNRRKRISN      | QIAPGQTGNIADYNYKLP     | SKVSGNYNYLYRLFRKSNLKPFFERDIST |

| Sars-CoV- 2 Variants | Pep 8 - RBD S1 subunit | Pep 9 - S1 subunit          | Pep 10 - S1 subunit | Pep 11 - S1 subunit | Pep 13 - S2 subunit    |
|----------------------|------------------------|-----------------------------|---------------------|---------------------|------------------------|
| N4S11-SC2            | YFPLQSYGFQPTNGVGY      | TESNKKFLPFQQFGRDIADTTDAVRDP | HADQLTPTWRVYSTGSN   | SYQTQTNSPRRARS      | ILPDPSKPSKRSFIEDLLFNKV |
| Alpha                | YFPLQSYGFQPTNGVGY      | TESNKKFLPFQQFGRDIADTTDAVRDP | HADQLTPTWRVYSTGSN   | SYQTQTNSHRRARS      | ILPDPSKPSKRSFIEDLLFNKV |
| Beta                 | YFPLQSYGFQPTNGVGY      | TESNKKFLPFQQFGRDIADTTDAVRDP | HADQLTPTWRVYSTGSN   | SYQTQTNSPRRARS      | ILPDPSKPSKRSFIEDLLFNKV |
| Gamma                | YFPLQSYGFQPTNGVGY      | TESNKKFLPFQQFGRDIADTTDAVRDP | HADQLTPTWRVYSTGSN   | SYQTQTNSPRRARS      | ILPDPSKPSKRSFIEDLLFNKV |
| Delta                | YFPLQSYGFQPTNGVGY      | TESNKKFLPFQQFGRDIADTTDAVRDP | HADQLTPTWRVYSTGSN   | SYQTQTNSPRRARS      | ILPDPSKPSKRSFIEDLLFNKV |
| Omicron              | YFPLRSYSFRPTYGVGY      | TESNKKFLPFQQFGRDIADTTDAVRDP | HADQLTPTWRVYSTGSN   | SYQTQTNSHRRARS      | ILPDPSKPSKRSFIEDLLFNKV |

| Sars-CoV- 2 Variants | Pep 15 - S2 subunit  | N Protein            | N Protein         | N Protein (CTD)       | N Protein (NTD)   |
|----------------------|----------------------|----------------------|-------------------|-----------------------|-------------------|
| N4S11-SC2            | FKEELDKYFKNHTSPDVLGD | TGSNQNGERSGARSQRRPQG | RSSSRSRNSSRNSTPGS | GQTVTKKSAAEASKKPRQKRT | TNSSPDDQIGYYRRATR |
| Alpha                | FKEELDKYFKNHTSPDVLGD | TGSNQNGERSGARSQRRPQG | RSSSRSRNSSRNSTPGS | GQTVTKKSAAEASKKPRQKRT | TNSSPDDQIGYYRRATR |
| Beta                 | FKEELDKYFKNHTSPDVLGD | TGSNQNGERSGARSQRRPQG | RSSSRSRNSSRNSTPGS | GQTVTKKSAAEASKKPRQKRT | TNSSPDDQIGYYRRATR |
| Gamma                | FKEELDKYFKNHTSPDVLGD | TGSNQNGERSGARSQRRPQG | RSSSRSRNSSRNSTPGS | GQTVTKKSAAEASKKPRQKRT | TNSSRDDQIGYYRRATR |
| Delta                | FKEELDKYFKNHTSPDVLGD | TGSNQNGERSGARSQRRPQG | RSSSRSRNSLRNSTPGS | GQTVTKKSAAEASKKPRQKRT | TNSSPDDQIGYYRRATR |
| Omicron              | FKEELDKYFKNHTSPDVLGD | TGSNQNGERSGARSQRRPQG | RSSSRSRNSSRNSTPGS | GQTVTKKSAAEASKKPRQKRT | TNSSPDDQIGYYRRATR |

**Supplementary Figure S3. Comparative analysis of amino acid sequences of selected peptides in N4S11-CoV2 and some SARS-2 variants of interest.** Surface glycoprotein - N4S11-SC2 Peptides (Wuhan-Hu-1, YP\_009724390.1); Alpha (B.1.1.7, QWE88920.1); Beta (B.1.351, UPD30382.1); Gamma (P.1, QVQ47339.1); Delta (B.1.617.2, UHV13980.1); and Omicron (UOX09450.1). Nucleocapsid protein - N4S11-SC02 Peptides (Wuhan-Hu-1, YP\_009724397.2); Alpha (B.1.1.7, QWE88928.1); Beta (B.1.351, UPD30390.1); Gamma (P.1, QVQ47347.1); Delta (B.1.617.2, UHV13987.1); Omicron (UOX09458.1) (Sanches et al., 2021; Alcantara et al., 2022). Red color indicates amino acid variation.



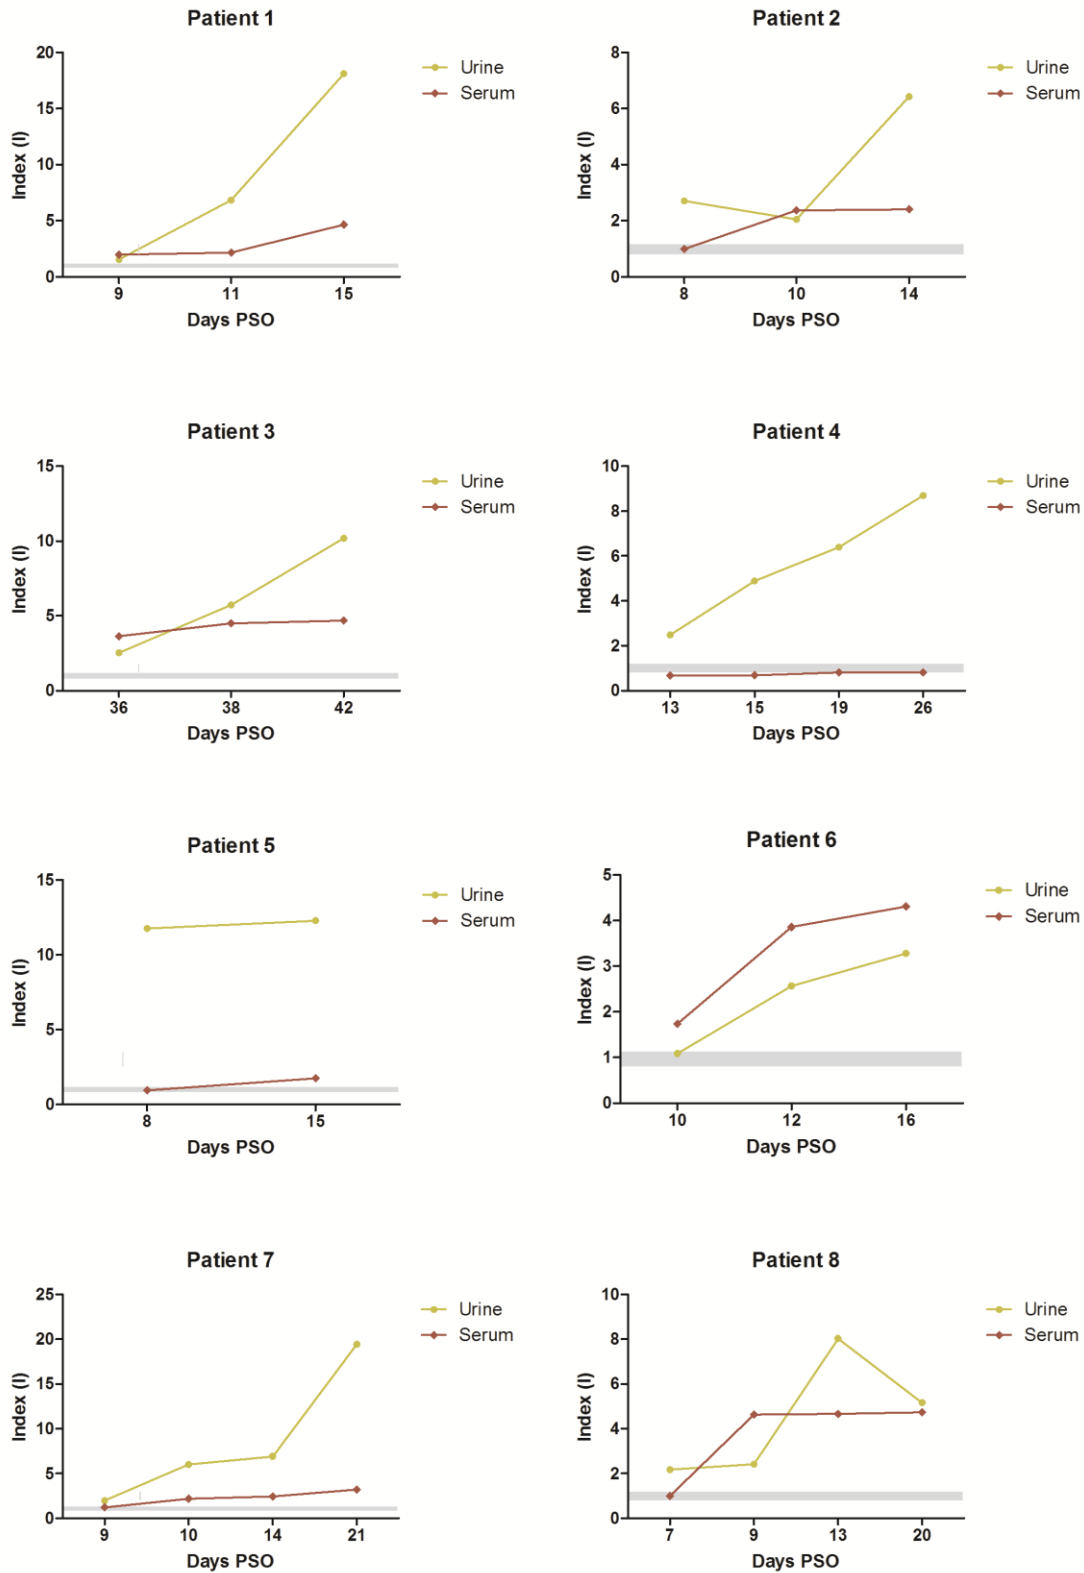

**Supplementary Figure S4. Dynamics of IgG antibody conversion in patient urine and serum samples.** Figures show the IgG levels specific to the N4S11-SC2 for eight patients, with longitudinal collection on different days post-symptom onset. The plotted index values (I) were related to the absorbance ratio on the cut-off.
